# Supplementary material for: Mitochondrial glycerol 3-phosphate facilitates bumblebee pre-flight thermogenesis
Source: PubMed Central journal article supplement (PMC5638826; doi:10.1038/s41598-017-13454-5), 2017-10-12
Supplement: 41598_2017_13454_MOESM1_ESM.pdf [file 41598_2017_13454_MOESM1_ESM.pdf]

1 **Title: Mitochondrial glycerol 3-phosphate facilitates bumblebee pre-flight**  
2 **thermogenesis**

3 Authors: Stewart W.C. Masson<sup>1</sup>, Christopher P. Hedges<sup>1, 2</sup>, Jules B. L. Devaux<sup>1</sup>, Crystal S.  
4 James<sup>1</sup> and Anthony J. R. Hickey<sup>1\*</sup>

5 Supplementary Results

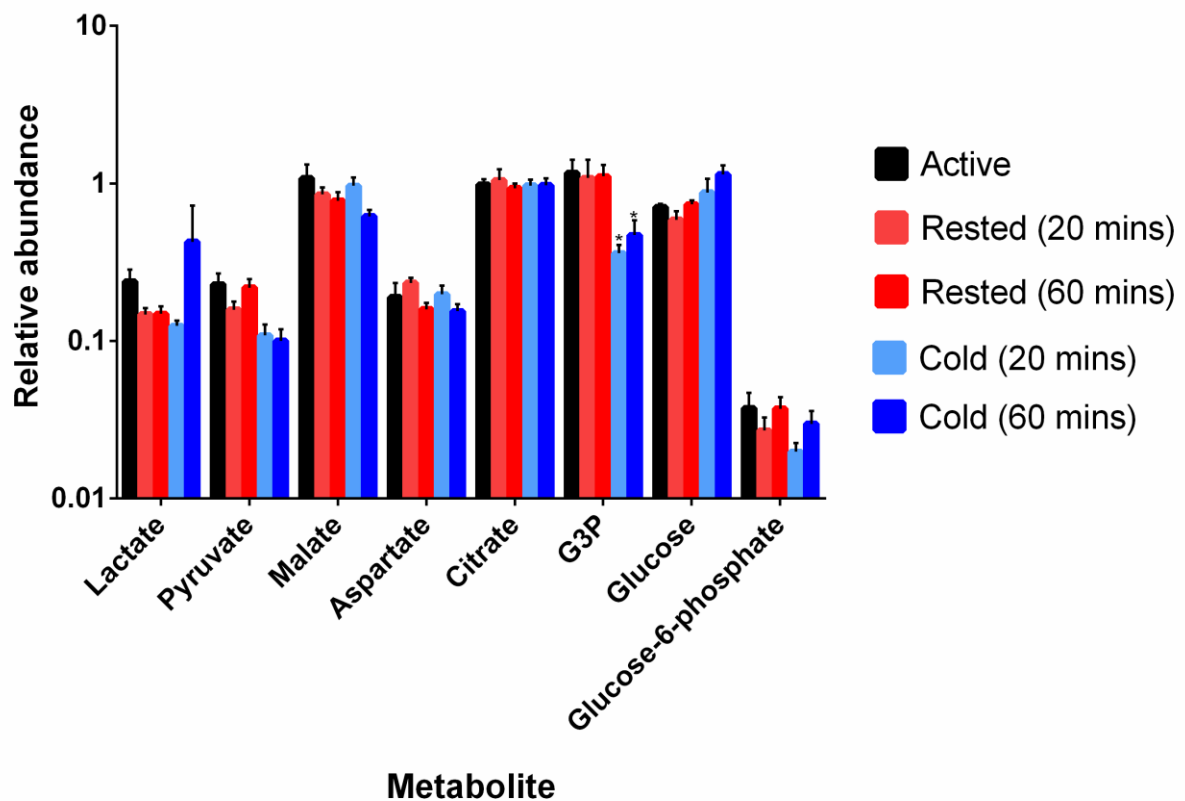

6  
7 **Supplementary Information Figure 1** Relative abundance of various glycolytic and citric  
8 acid cycle intermediates across control, rested and cold exposed groups, data is presented on a  
9 log axis to make visualisation of each metabolite easier. Data are mean  $\pm$  s.e.m of 5 replicates.  
10 \* $P < 0.05$ , two-sample students t-tests for pair-wise comparisons, two-way analysis of variance  
11 for multiple comparison.

## 12 Supplementary Methods

13 Six TEC-12706 Peltier pads were attached to a Gold-anodised, aluminium heat sink with  
14 thermal grease. Aluminium wells, measuring 10mm in height, 38mm in diameter for a total  
15 volume of 11ml were attached to the top of the Peltier pads with more thermal grease. The heat  
16 sink and wells were all insulated and isolated from each other with polystyrene. Three of the  
17 wells functioned as control chambers while the other three received samples. The heat-sink,  
18 Peltier pads, wells were all enclosed in polystyrene which was then placed inside a larger  
19 polystyrene box producing a double layer design. This was then placed inside a 20°C  
20 temperature controlled room. This larger box was fastened to a Stuart SSM1 mini-shaker table  
21 (Bobby Scientific Limited, Staffordshire, United Kingdom) which allowed mixing of the wells  
22 without interference by a stirrer rod or bar. Each Peltier pad was connected via shielded coaxial  
23 cable and attached to an SP series 16/s AD Instruments Power lab (AD Instruments, Dunedin,  
24 New Zealand). Data was collected using Lab Chart 7 (AD Instruments). The signal from the  
25 control chambers was subtracted from the experimental signal using Lab Chart. The  
26 calorimeter was calibrated by filling each chamber with respiratory media and submerging a  
27 resistor which produced known wattages. This value was then compared to the voltages  
28 detected by the calorimeter, observed as a mV response in Lab Chart (Supplementary Methods,  
29 Figure 1). Substrates and inhibitors were injected into the chamber via tubing attached to  
30 syringes outside the calorimeter. This prevents heat being introduced to the chamber by the  
31 user during injection of compounds. Data generated by our calorimeter was validated by  
32 comparing against data generated in other studies using similar in-house designs  
33 (Supplementary Methods, Table 1). It was found to be within the range of previously generated  
34 values from other highly-energetic tissues.

| Heat Production Value (mW/g)        | Organism and Tissue                             | Physiological Parameter                               | Experimental Temperature | Reference |
|-------------------------------------|-------------------------------------------------|-------------------------------------------------------|--------------------------|-----------|
| 39.2 ± 5.4                          | <i>Permeablised B. terrestris</i> flight muscle | Leak respiration with G3P as a substrate              | 20°C                     | –         |
| 22.2 ± 1.6                          | Cat cardiac muscle                              | Contracting muscle with caffiene and Ca <sup>2+</sup> | 25°C                     | 36        |
| 37.6 ± 5.2                          | Guinea pig cardiac muscle                       | Contracting muscle with caffiene and Ca <sup>2+</sup> | 25°C                     | 36        |
| 30 ± 2.8                            | Rat cardiac muscle                              | Contracting muscle with caffiene and Ca <sup>2+</sup> | 25°C                     | 36        |
| 0.53 to 0.75 (inter quartile range) | Human vastus lateralis                          | "Resting metabolism" with glucose                     | 37°C                     | 37        |
| 12 to 17 (range)                    | Tent moth flight muscle                         | Shivering                                             | 20°C                     | 38        |
| 18.3 ± 1.5                          | Permeablised guinea pig cardiac muscle          | Leak respiration with PM as substrates                | 37°C                     | 39        |
| 36 ± 8                              | Permeablised guinea pig cardiac muscle          | Leak respiration with glucose and pyruvate            | 37°C                     | 39        |
| "Up to 170" (reported value)        | Permeablised guinea pig cardiac muscle          | Uncoupled respiration with glucose and pyruvate       | 37°C                     | 40        |
| 106 ± 40 (dry weight)               | Permeablised guinea pig cardiac muscle.         | Leak respiration with PM as substrates                | 37°C                     | 41        |

35 **Supplementary Methods Table 1** Table of experimentally determined calorimetry values

36 used to validate our calorimeter with references.

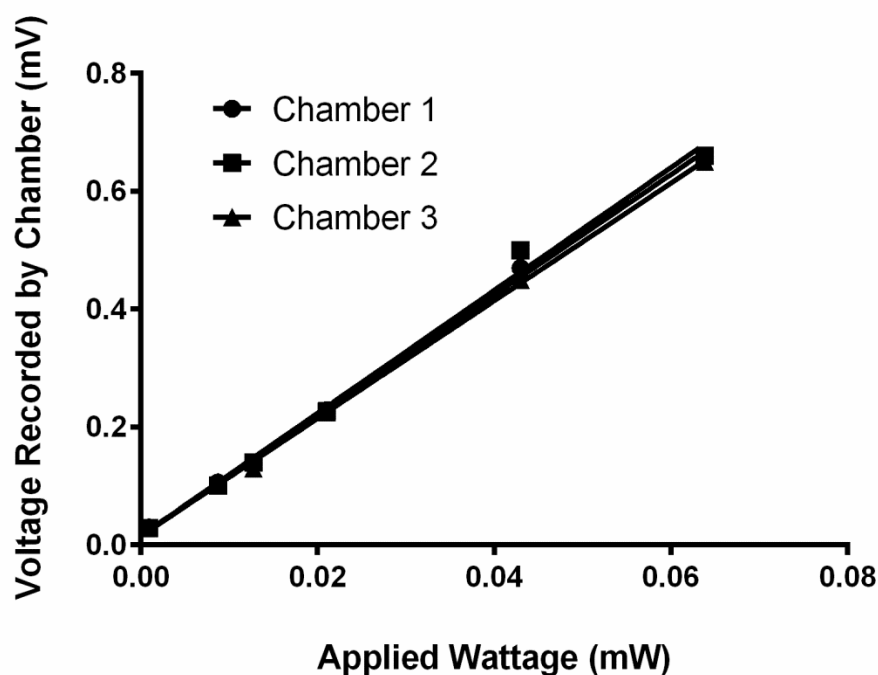

37

38 **Supplementary Methods Figure 1** Calibration curve of purpose built calorimeter.
